## ERRATA

The Editorial by Maze, published in the June, 1990 issue (Maze M: Transmembrane signalling and the holy grail of anesthesia. *ANESTHESIOLOGY* 72:959–961, 1990) contained an error. On page 960, the last sentence of the legend for figure 1 should read: Modified with permission from Michell RH: Post-receptor signalling pathways. *Lancet* 1:765–768, 1989.

The Clinical Investigation by Ferrari and Bedford published in the June, 1990 issue (Ferrari LR, Bedford RF: General anesthesia prior to treatment of anterior mediastinal masses in pediatric cancer patients. *ANESTHESIOLOGY* 72:991–995, 1990) contained an error. On page 992, table 1, the heading for column 2 should read "Patients" and not "Points".

The Laboratory Investigation by Archer *et al.*, published in the June, 1990 issue (Archer DP, Labrecque P, Tyler JL, Meyer E, Evans AC, Villemure JG, Casey WF, Diksic M, Hakim AM, Trop D: Measurement of cerebral blood flow and volume with positron emission tomography during isoflurane administration in the hypocapnic baboon. *ANESTHESIOLOGY* 72:1031–1037, 1990) contained an error. On page 1035, the legend for figure 3 should read: FIG. 3. Representative images of the lower and upper coronal slices of the CBF and CBV scans to show the regions of interest chosen to represent "global" (b, c, d, e) and "regional" (a) values for CBF (*left*) and CBV (*right*). Scans are oriented such that anterior in each scan is superior in the figure, and the right-left orientation is correct.

In the July, 1990 issue of *ANESTHESIOLOGY*, a Clinical Investigation by Raemer *et al.* (Raemer DB, Buschman A, Varvel JR, Philip BK, Johnson MD, Stein DA, Shafer SL: The prospective use of population pharmacokinetics in a computer-driven infusion system for alfentanil. *ANESTHESIOLOGY* 73:66–72, 1990) contained two errors. Reference 9 should be: Scott JC, Stanski DR: Decreased fentanyl and alfentanil dose requirements with age. A simultaneous pharmacokinetic and pharmacodynamic evaluation. *J Pharmacol Exp Ther* 240:159–166, 1987). In table 1, the  $k_{21}$  micro-rate constant is 0.0673 (not 0.673 as shown).
